# Supplementary material
Source: PubMed Central journal article supplement (PMC4363306)
Supplement: NIHMS621374-supplement-01.pdf [file NIHMS621374-supplement-01.pdf]

## INVENTORY OF SUPPLEMENTARY MATERIAL

Supplemental material includes following items:

- 12 Supplementary Figures
  - 2 Supplementary Tables
- **Supplementary Figure S1** Comparison of FcεRI expression and surface IgE loading in IgE<sub>R</sub>-TG and WT animals.
  - **Supplementary Figure S2** Characterization of background- and age-related effects on IgE and IgG1 levels in IgE<sub>R</sub>-TG mice.
  - **Supplementary Figure S3** Flow cytometric analysis of CD23 expression on splenocytes of IgE<sub>R</sub>-TG and WT animals.
  - **Supplementary Figure S4** Characterization of IgE/FcεRI-derived signals in DCs (microarray analysis)
  - **Supplementary Figure S5** Further characterization of the food allergy model.
  - **Supplementary Figure S6** Additional parameters determined in the asthma model.
  - **Supplementary Figure S7** House dust mite (HDM)-induced airway inflammation in WT and IgE<sub>R</sub>-TG animals.
  - **Supplementary Figure S8** Additional characterization of the T cell phenotype induced via IgE/FcεRI-mediated antigen presentation.
  - **Supplementary Figure S9** Additional data regarding antigen-mediated IgE/FcεRI cross-linking.
  - **Supplementary Figure S10** Characterization of mast cell progenitor cultures and their migratory behavior.
  - **Supplementary Figure S11** Antigen-specific IgE/FcεRI-crosslinking on LPS-activated murine or human DCs does not inhibit upregulation of co-stimulatory molecules.
  - **Supplementary Figure S12** The immune regulatory function of IgE/FcεRI-mediated DC activation (model).
- Table S1: **mRNA expression pattern of bm-DCs**
  - Table S2: **mRNA expression pattern of small intestinal tissue from a representative food allergy experiment.**

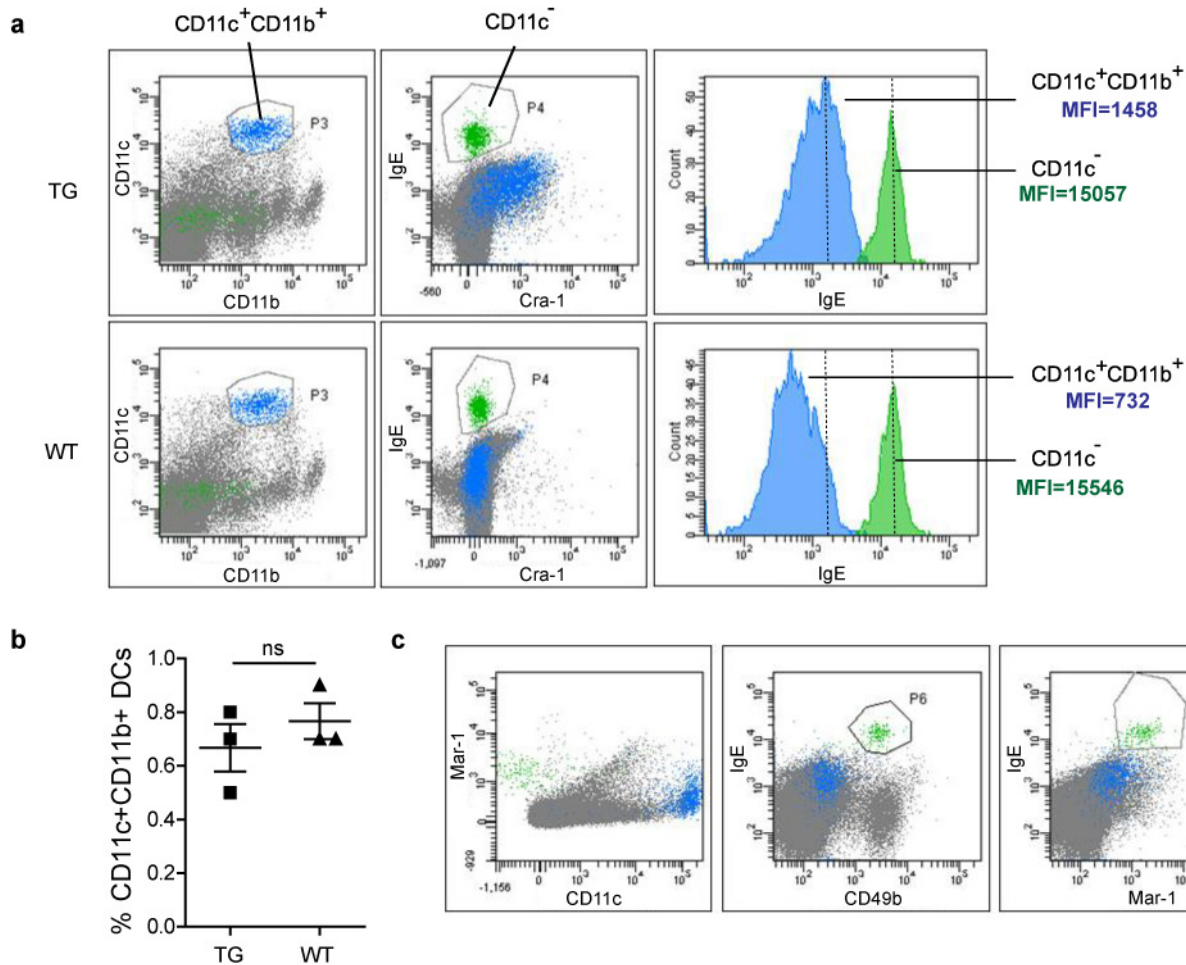

**Supplementary Figure S1** Comparison of FcεRI expression and surface IgE loading in IgE<sub>R</sub>-TG and WT animals. **(a)** Splenocytes from IgE<sub>R</sub>-TG and WT animals were stained for CD11c<sup>+</sup>CD11b<sup>+</sup> DCs, IgE and human FcεRI expression (Cra-1). In IgE<sub>R</sub>-TG animals, CD11c<sup>+</sup>CD11b<sup>+</sup> DCs express human FcεRI (depicted in blue) and are loaded with low to moderate levels of IgE at steady state. **(b)** IgE<sub>R</sub>-TG and WT animals display similar numbers of CD11c<sup>+</sup>CD11b<sup>+</sup> DCs in the spleen. Percentages are representative of 3 individual mice. **(c)** Gating strategy for basophils. Cells were analyzed for their expression of murine FcεRI (Mar-1) and the basophil marker CD49b. In the spleen, CD11c<sup>-</sup> cells with high IgE surface loading (in green) were identified as basophils by their co-expression of CD49b and the murine FcεRI.

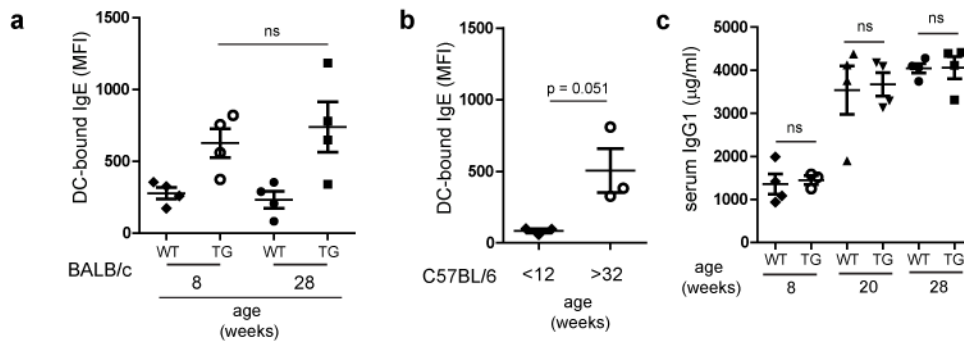

**Supplementary Figure S2** Characterization of background- and age-related effects on IgE and IgG1 levels in IgE<sub>R</sub>-TG mice. **(a)** No significant increase in the DC-bound IgE pool in mice on the BALB/c background is found between 8 and 28 weeks of age. **(b)** On the C57BL/6 background, the DC-bound IgE in mice increases with age. **(c)** Serum IgG1 levels increase similarly with age in WT and IgE<sub>R</sub>-TG (Balb/c) animals.

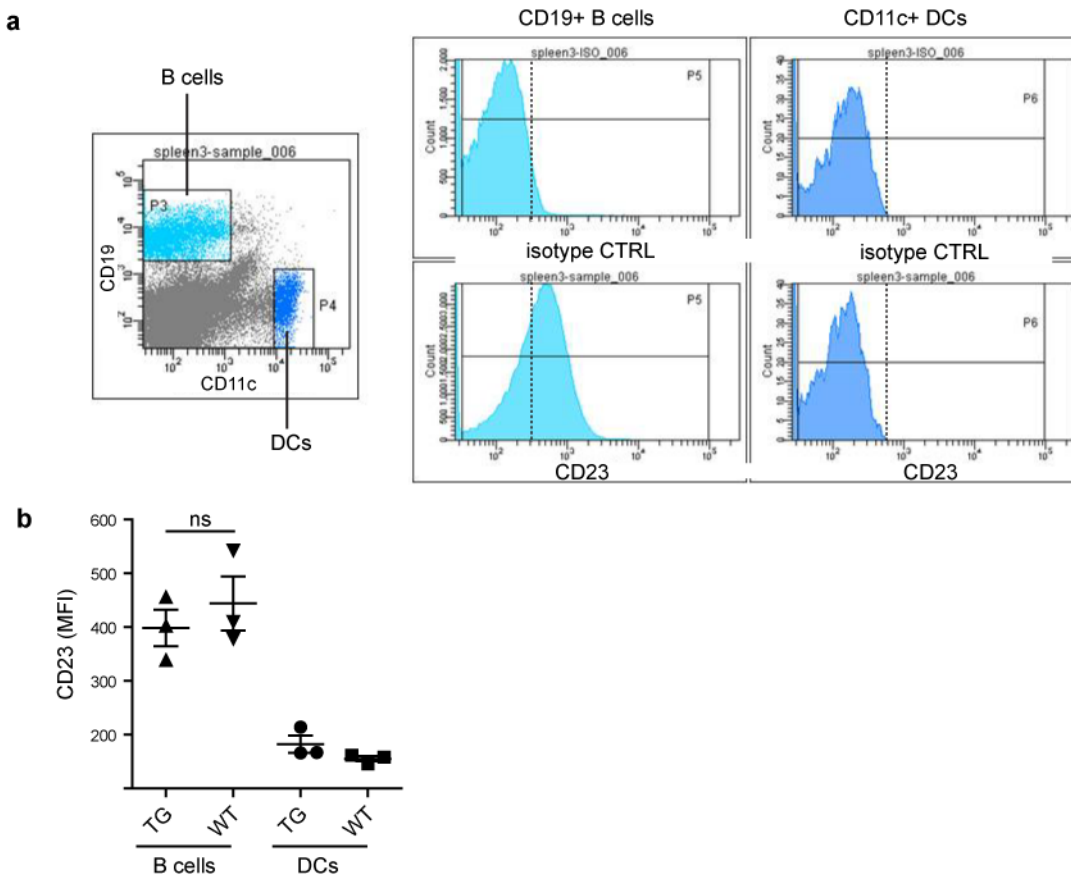

**Supplementary Figure S3** Flow cytometric analysis of CD23 expression on splenocytes of IgE<sub>R</sub>-TG and WT animals. **(a)** CD23 is expressed on B cells but not on murine DCs. CD19<sup>+</sup> B cells and CD11c<sup>+</sup> DCs were gated (dot plot) and analyzed for CD23 expression (histograms). **(b)** Mean fluorescence intensity (MFI) of CD23 on B cells and DCs of 3 individual mice is depicted.

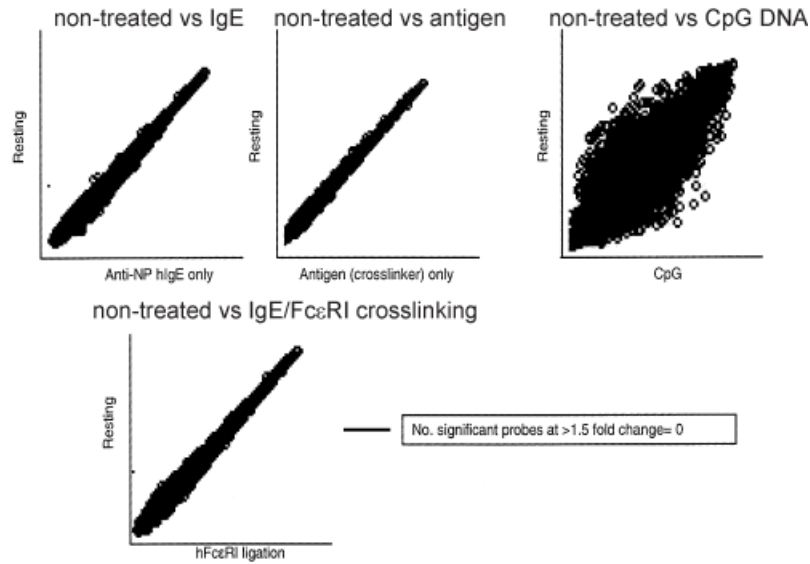

**Supplementary Figure S4** Characterization of IgE/FcεRI-derived signals in DCs. Microarray analysis performed with bone marrow-derived cDCs. Data represent the average of 2 experiments performed in triplicates at 24 h and 48 h post stimulation. Unstimulated cells (non-treated) were compared with cells incubated with NP-specific IgE alone, NP-OVA (antigen) alone, CpG DNA, or NP-specific IgE plus NP-OVA (FcεRI crosslinking). Data were analyzed with GenePattern seeking for transcripts regulated by a factor of 1.5 over controls. Of note, DCs used for the microarray analysis were from a different available FcεRI-humanized mouse model (i.e. FcεRI $\alpha$ -TG; Ref. (33)).

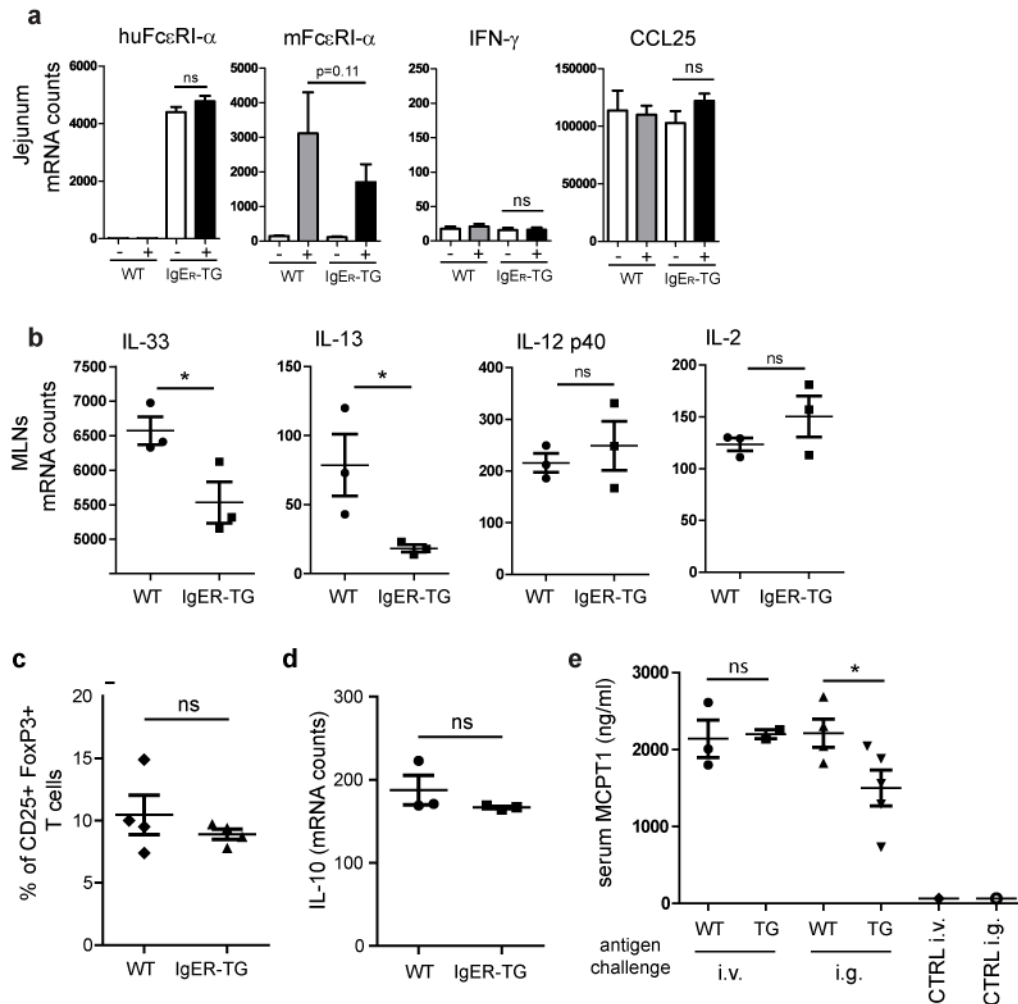

**Supplementary Figure S5** Further characterization of the food allergy model. **(a)** Additional data sets of mRNA profiling of GI tissue. Tissue mRNA levels of human and murine FcεRIα-chain (huFcεRIα and mFcεRIα). IFN-γ is expressed at low levels and expression remains unaltered upon sensitization and challenge (+). Transcript levels of CCL25, a chemokine abundantly expressed in the small intestine, did not change. **(b)** mRNA expression levels in the MLNs of food allergic mice. **(c)** Comparative analysis of Tregs and **(d)** IL-10 mRNA expression levels in WT and IgER-TG animals **(e)** Mast cell protease 1 (MCPT1) levels in serum are lower in IgER-TG mice after intra-gastric (i.g.), but not after intravenous (i.v.) antigen challenge. Control mice received PBS. Serum MCTP1 levels were measured 1 h after antigen challenge.

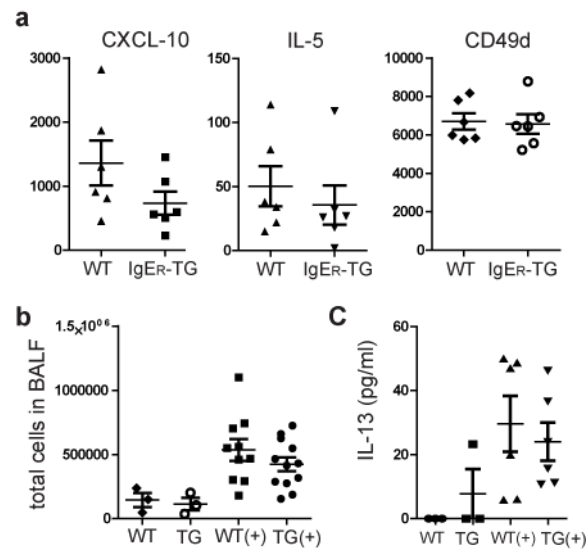

**Supplementary Figure S6** Additional parameters determined in the asthma model. **(a)** Additional data sets of mRNA profiling of lung tissue after allergic asthma induction. CD49d (integrin alpha subunit) is shown as one example of unaltered transcript levels. **(b)** Counts of total cells in the bronchoalveolar lavage fluid (BALF) of non-treated mice and sensitized (+) WT and IgE<sub>R</sub>-TG mice. **(c)** IL-13 levels in BALF. Symbols represent individual mice of 2 independent experiments.

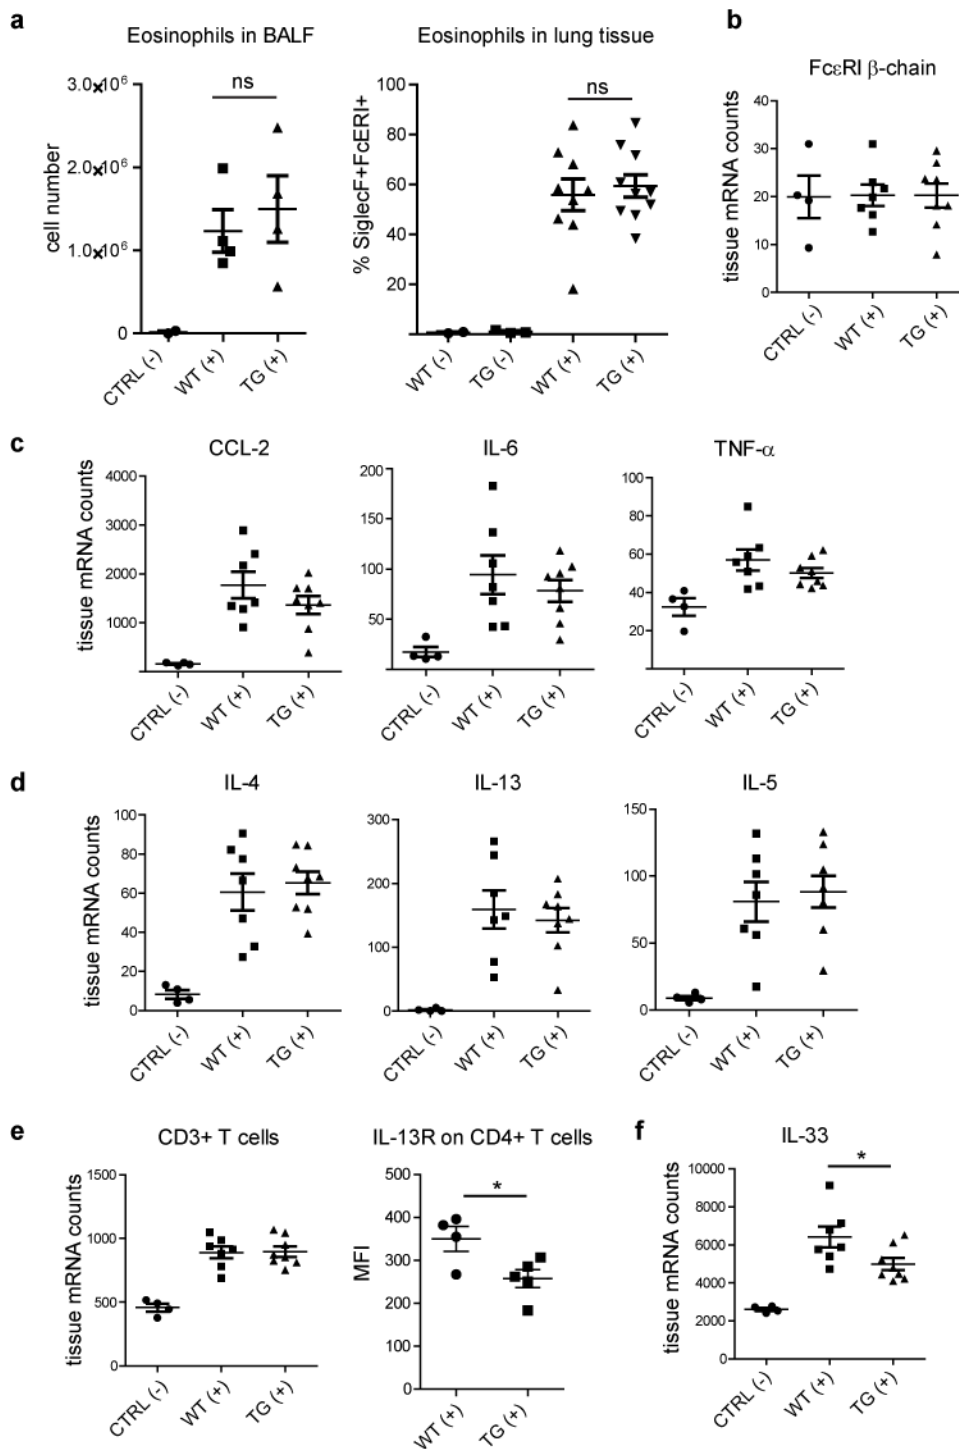

**Supplementary Figure S7** House dust mite (HDM)-induced airway inflammation in WT and IgE<sub>R</sub>-TG animals. **(a)** Assessment of eosinophil infiltration in BALF and lung tissue. **(b-d)** mRNA profiling of lung tissue. **(e)** CD4<sup>+</sup> T cells in the lungs of HDM-sensitized (+) IgE<sub>R</sub>-TG animals express lower levels of IL-13 receptor compared to sensitized WT animals. **(f)** IL-33 expression is higher in the lungs of HDM-sensitized WT animals. All symbols represent individual mice of 2 independent experiments.



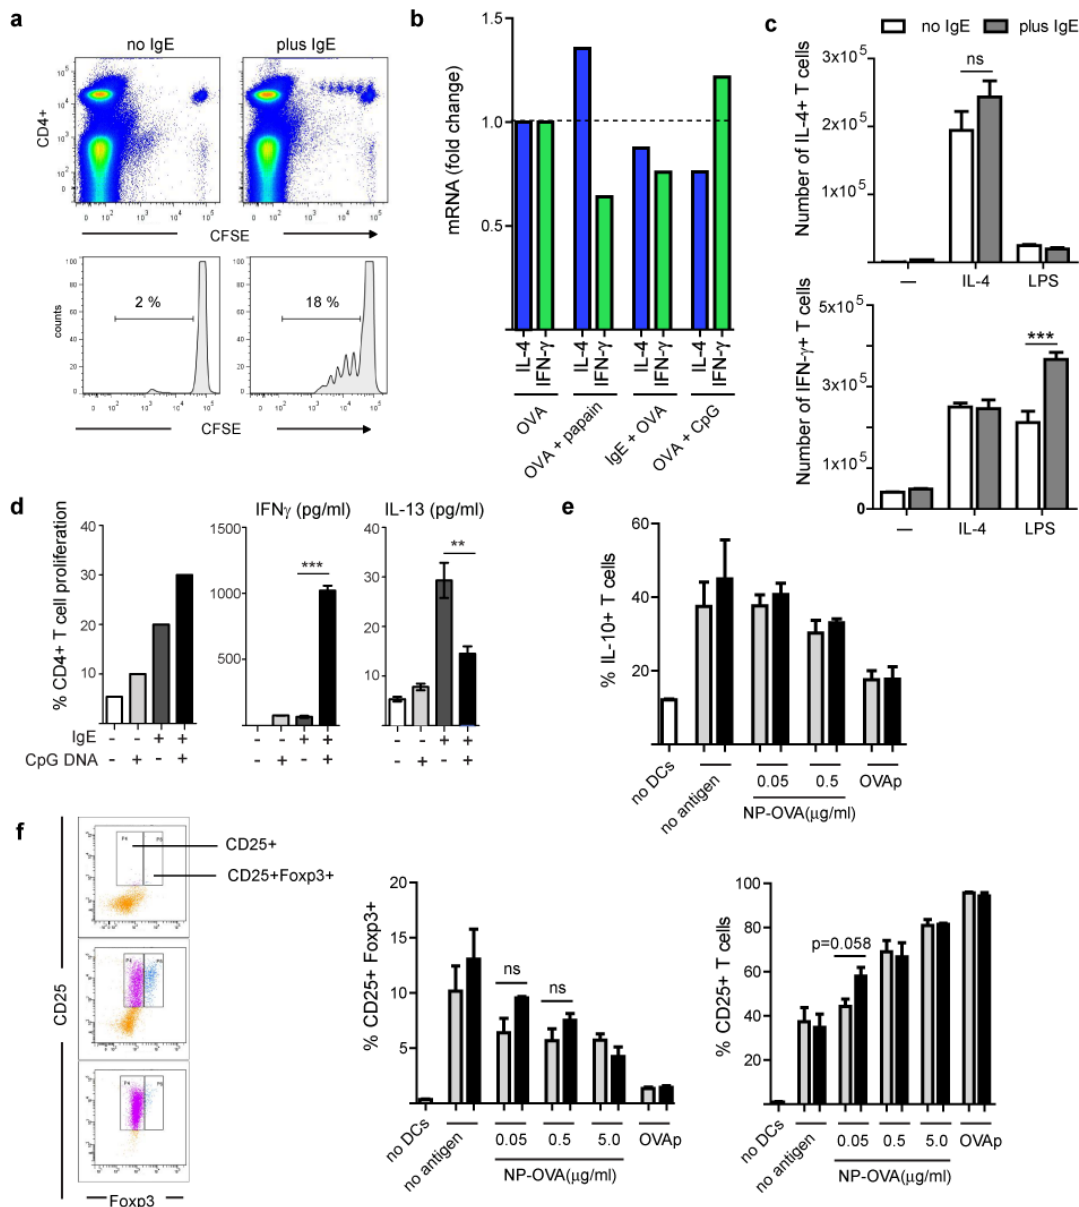

**Supplementary Figure S8** Additional characterization of the T cell phenotype induced via IgE/Fc $\epsilon$ RI-mediated antigen presentation. **(a)** *In vivo* OT-II T cell proliferation assay. Splenic DCs were incubated with IgE-containing (plus) or control (no) medium and loaded with 0.05  $\mu$ g/ml NP-OVA *in vitro* before injected into recipient mice. Representative experiment (n=3). **(b)** Papain treatment of DCs induces a Th2 profile *in vivo*, but IgE-mediated antigen uptake does not. DCs were stimulated as indicated. After *in vivo* proliferation for 3 days, CD4<sup>+</sup> T cells from were isolated and IL-4 and IFN- $\gamma$  expression was determined. **(c)** Corresponding total cell numbers to data presented in Figure 7f. **(d)** *In vitro* antigen presentation assay in the presence of CpG DNA. IFN- $\gamma$  and IL-13 production was measured at day 3 in the DC/T cell co-cultures. **(e)** *In vitro* antigen presentation assay. Priming of IL-10 expressing T cells in the presence of TGF- $\beta$ 1 is not influenced by IgE-mediated antigen uptake. Intracellular cytokine staining day 6 (n=2). **(f)** *In vitro* generation of iTregs is not significantly affected by IgE-mediated antigen uptake by DCs. Naïve CD4<sup>+</sup>CD25<sup>-</sup> OT-II T cells were co-cultured with DCs and TGF- $\beta$ 1 or 6 days. FACS blot show gating strategy for CD25<sup>+</sup> Foxp3<sup>+</sup> cells (top to bottom: T cells in the absence of DCs, DC stimulated with antigen, and DCs treated with OVAp).

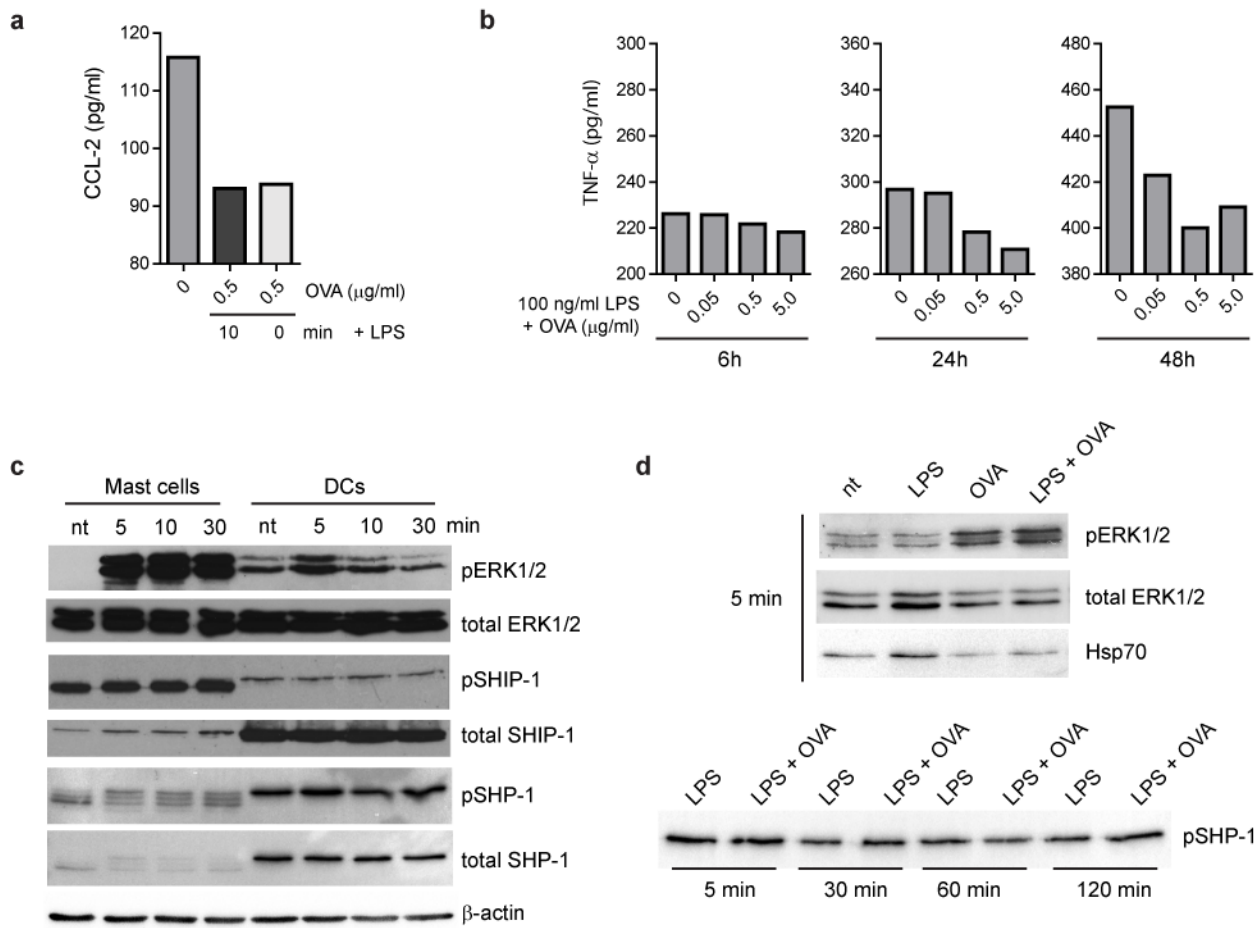

**Supplementary Figure S9** Additional data regarding antigen-mediated IgE/FcεRI cross-linking. **(a)** LPS-induced CCL-2 production is inhibited independently of simultaneous or consecutive FcεRI cross-linking. IgE-loaded DCs were stimulated with LPS (all conditions). Indicated concentrations of OVA were added for IgE/ FcεRI crosslinking, either simultaneously with LPS (0 min) or after 10 min. Culture supernatant was harvested after 48h and CCL-2 production was analyzed by ELISA. Data are representative of pooled triplicates. **(b)** Time course and antigen dose response experiments. DCs were stimulated with indicated concentrations of OVA and cell culture supernatants were analyzed after 6h, 24h and 48h. Inhibition of CCL-2 production becomes more obvious over the time course. **(c)** Comparison of signaling events induced upon antigen-mediated FcεRI cross-linking in mast cells and DCs. Bone-marrow derived mast cells and DCs were pre-loaded with NP-specific IgE. Receptor crosslinking was induced with 0.5μg/ml NP-OVA, cell extracts were prepared after indicated time points, and signaling molecules were analyzed by immunoblot. **(d)** FcεRI cross-linking does not lead to increased SHP-1 phosphorylation upon LPS co-stimulation. IgE-loaded DCs were co-stimulated with LPS and NP-OVA as indicated and signaling molecules were analyzed by immunoblot.

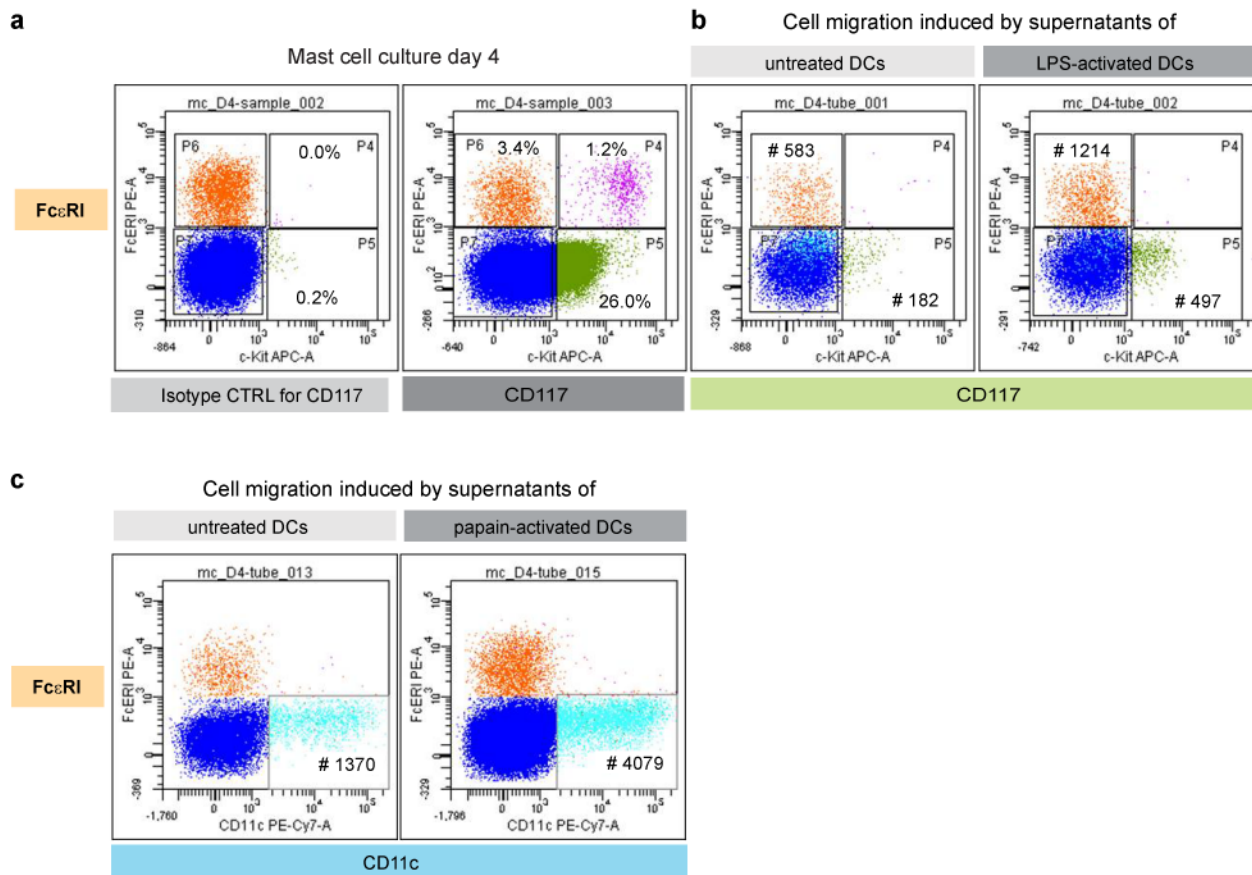

**Supplementary Figure S10** Characterization of mast cell progenitor cultures and their migratory behavior. **(a)** Bone marrow cells were cultured with IL-3 and SCF for 4 days and analyzed by FACS (left dot plots). Early mast cell cultures contain cKit<sup>+</sup> progenitor cells, few cKit<sup>+</sup>FcεRI<sup>+</sup> mast cells, basophils (cKit<sup>-</sup>FcεRI<sup>+</sup>) and CD11c<sup>+</sup> cells (see dot plots in c). **(b)** Supernatants of LPS-activated DCs promote migration of cKit<sup>+</sup> mast cell progenitors but not of cKit<sup>+</sup>FcεRI<sup>+</sup> mast cells. **(c)** Migration of CD11c<sup>+</sup> cells induced by supernatants of papain-activated DCs.

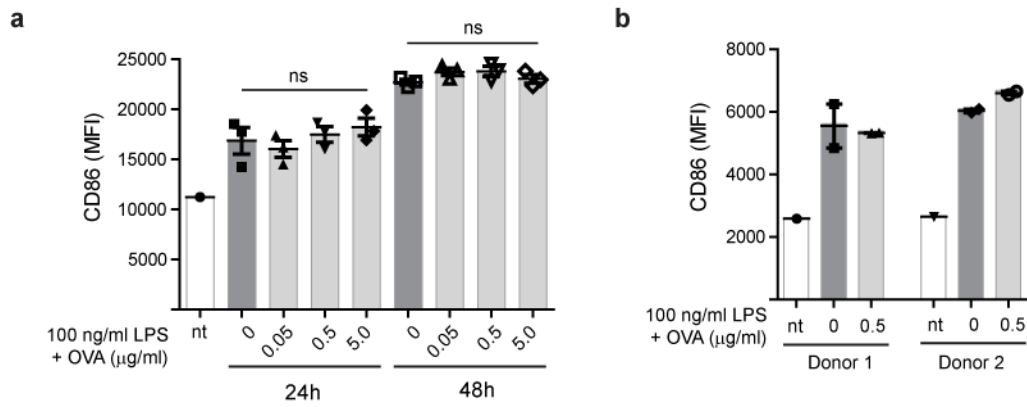

**Supplementary Figure S11** Antigen-specific IgE/FcεRI-crosslinking on LPS-activated murine or human DCs does not alter upregulation of co-stimulatory molecules. **(a)** Murine DCs isolated from spleens were pre-loaded with NP-specific IgE before stimulation with indicated concentrations of NP-OVA and LPS for 24h and 48h. Data represent MFI of CD86 from biological triplicates (nt = not treated, n=2). **(b)** Analysis of CD86 expression on human monocyte-derived DCs from 2 different donors. Samples were treated as indicated and analyzed after 24h. Biological duplicates are shown.

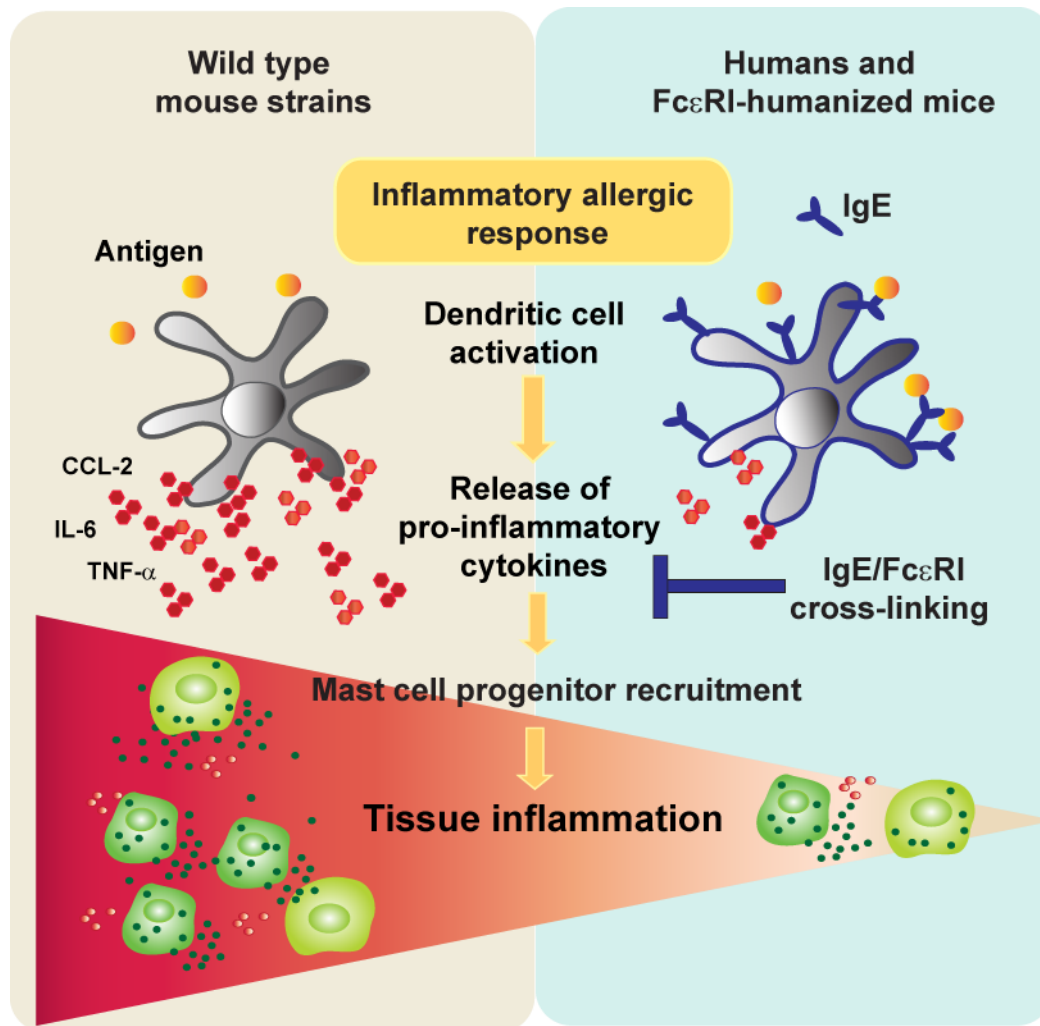

**Supplementary Figure S12** The immune regulatory function of IgE/FcεRI-mediated DC activation. DCs produce inflammatory cytokines and chemokines during allergic responses. IgE/FcεRI-mediated DC activation inhibits release of these allergy promoting mediators and thereby restrains mast cell infiltration and allergic tissue inflammation.

Table S1: mRNA expression pattern of bm-DCs (\* counts &lt; 25 = at detection limit).

| mRNA*<br>(direct counts)        | NP-OVA |         | NP-OVA + IgE |         | NP-OVA<br>plus CpG DNA |         | NP-OVA<br>plus papain |         |
|---------------------------------|--------|---------|--------------|---------|------------------------|---------|-----------------------|---------|
|                                 | Mean   | +/- SEM | Mean         | +/- SEM | Mean                   | +/- SEM | Mean                  | +/- SEM |
| arginase1                       | 26     | 6       | 28           | 2       | 44                     | 7       | 36                    | 3       |
| CCL1                            | 10     | 2       | 9            | 2       | 67                     | 13      | 18                    | 3       |
| CCL11 (eotaxin)                 | 5      | 1       | 7            | 1       | 10                     | 3       | 10                    | 3       |
| CCL12 (MCP-5)                   | 9      | 2       | 7            | 0       | 15                     | 2       | 35                    | 5       |
| CCL17 (TARC)                    | 20     | 2       | 24           | 5       | 518                    | 17      | 251                   | 12      |
| CCL19 (MIP-3 $\beta$ )          | 11     | 2       | 10           | 5       | 20                     | 0       | 16                    | 2       |
| CCL2                            | 11     | 2       | 13           | 1       | 49                     | 11      | 88                    | 5       |
| CCL-20 (MIP-3 $\alpha$ )        | 10     | 0       | 8            | 2       | 12                     | 1       | 12                    | 3       |
| CCL22 (MDC)                     | 4834   | 65      | 5231         | 133     | 34260                  | 1517    | 35968                 | 197     |
| CCL3 (MIP-1 $\alpha$ )          | 113    | 5       | 107          | 16      | 7864                   | 303     | 1768                  | 74      |
| CCL4 (MIP-1 $\beta$ )           | 19     | 3       | 20           | 3       | 1072                   | 97      | 150                   | 7       |
| CCL5 (RANTES)                   | 10938  | 26      | 12189        | 414     | 18512                  | 893     | 39863                 | 557     |
| CCL7 (MCP-3)                    | 28     | 4       | 36           | 1       | 46                     | 3       | 56                    | 4       |
| CCL8 (MCP-2)                    | 14     | 1       | 15           | 1       | 18                     | 2       | 18                    | 1       |
| CCL9                            | 1322   | 28      | 1377         | 40      | 4190                   | 120     | 4258                  | 29      |
| Ccr1                            | 160    | 9       | 159          | 7       | 172                    | 13      | 190                   | 9       |
| Ccr5                            | 223    | 2       | 203          | 4       | 170                    | 24      | 129                   | 4       |
| Ccr7                            | 4969   | 165     | 6106         | 171     | 3623                   | 231     | 7997                  | 167     |
| CD23                            | 10     | 0       | 9            | 3       | 16                     | 4       | 9                     | 1       |
| CD40                            | 295    | 11      | 363          | 10      | 4230                   | 149     | 2944                  | 25      |
| CD64                            | 171    | 22      | 165          | 10      | 219                    | 18      | 354                   | 21      |
| CD80                            | 138    | 9       | 143          | 3       | 378                    | 33      | 271                   | 4       |
| CD86                            | 104    | 11      | 93           | 9       | 363                    | 30      | 250                   | 11      |
| Cox2                            | 25     | 1       | 33           | 4       | 674                    | 16      | 307                   | 18      |
| Cxcl1                           | 16     | 4       | 16           | 2       | 1174                   | 37      | 442                   | 12      |
| Cxcl10 (IP10)                   | 16     | 3       | 12           | 0       | 365                    | 86      | 630                   | 39      |
| Cxcl2                           | 28     | 2       | 22           | 3       | 1397                   | 47      | 555                   | 3       |
| Cxcl5                           | 5      | 2       | 6            | 1       | 98                     | 8       | 20                    | 1       |
| Cxcr3                           | 67     | 11      | 68           | 7       | 29                     | 4       | 30                    | 4       |
| Cxcr4                           | 1055   | 25      | 1106         | 46      | 429                    | 36      | 587                   | 17      |
| Cxcr5                           | 14     | 2       | 15           | 5       | 21                     | 3       | 23                    | 3       |
| FcR $\gamma$ -chain             | 1991   | 22      | 2043         | 13      | 2532                   | 129     | 2780                  | 58      |
| Fc $\gamma$ R IV                | 196    | 10      | 172          | 24      | 130                    | 16      | 155                   | 11      |
| Hprt1                           | 151    | 3       | 158          | 8       | 175                    | 9       | 139                   | 3       |
| Hsp90ab1                        | 843    | 2       | 859          | 5       | 1187                   | 45      | 1403                  | 29      |
| human Fc $\epsilon$ R1 $\alpha$ | 1032   | 24      | 1085         | 48      | 1350                   | 95      | 2026                  | 47      |
| IDO1                            | 16     | 5       | 20           | 2       | 27                     | 3       | 20                    | 1       |
| IL-10                           | 4      | 1       | 9            | 0       | 42                     | 3       | 26                    | 7       |
| IL-12a (p35)                    | 2      | 1       | 3            | 1       | 20                     | 1       | 22                    | 2       |
| IL-12b (p40)                    | 386    | 6       | 476          | 12      | 8518                   | 475     | 926                   | 5       |

Continuation of Table S1

| mRNA*<br>(direct counts)        | NP-OVA |         | NP-OVA + IgE |         | NP-OVA<br>+<br>CpG DNA |         | NP-OVA<br>+<br>papain |         |
|---------------------------------|--------|---------|--------------|---------|------------------------|---------|-----------------------|---------|
|                                 | Mean   | +/- SEM | Mean         | +/- SEM | Mean                   | +/- SEM | Mean                  | +/- SEM |
| IL-13                           | 11     | 3       | 12           | 0       | 20                     | 4       | 12                    | 4       |
| IL-15                           | 139    | 2       | 159          | 4       | 278                    | 18      | 390                   | 7       |
| IL-17a                          | 10     | 2       | 10           | 2       | 28                     | 2       | 31                    | 1       |
| IL-17E (IL-25)                  | 18     | 3       | 12           | 2       | 41                     | 1       | 40                    | 5       |
| IL-17F                          | 6      | 1       | 5            | 2       | 11                     | 0       | 11                    | 1       |
| IL-18                           | 67     | 3       | 63           | 7       | 98                     | 8       | 95                    | 6       |
| IL-1 $\alpha$                   | 24     | 3       | 24           | 2       | 349                    | 40      | 451                   | 16      |
| IL-1 $\beta$                    | 306    | 8       | 365          | 33      | 2946                   | 246     | 1028                  | 11      |
| IL-23a                          | 17     | 4       | 19           | 1       | 27                     | 4       | 25                    | 4       |
| IL-4                            | 10     | 3       | 9            | 1       | 14                     | 3       | 10                    | 2       |
| IL-5                            | 32     | 3       | 25           | 4       | 86                     | 12      | 88                    | 9       |
| IL-6                            | 86     | 5       | 91           | 6       | 1521                   | 74      | 544                   | 8       |
| IL-9                            | 8      | 1       | 9            | 1       | 10                     | 2       | 10                    | 3       |
| IFN- $\beta$ 1                  | 6      | 2       | 9            | 1       | 15                     | 2       | 8                     | 2       |
| IFN- $\gamma$                   | 9      | 1       | 6            | 1       | 13                     | 2       | 10                    | 1       |
| Itgax (CD11c)                   | 603    | 13      | 499          | 25      | 616                    | 62      | 613                   | 13      |
| Itgb2 (CD18)                    | 1616   | 27      | 1650         | 82      | 1513                   | 102     | 1409                  | 29      |
| Jag1                            | 123    | 2       | 138          | 3       | 482                    | 24      | 316                   | 4       |
| Jag2                            | 10     | 1       | 11           | 2       | 10                     | 2       | 7                     | 1       |
| mouse Fc $\epsilon$ R1 $\alpha$ | 15     | 4       | 11           | 2       | 23                     | 2       | 22                    | 1       |
| mouse Fc $\epsilon$ R1 $\beta$  | 4      | 1       | 4            | 0       | 3                      | 0       | 3                     | 0       |
| Nos2                            | 10     | 2       | 7            | 1       | 18                     | 1       | 23                    | 2       |
| PPAR- $\gamma$                  | 58     | 3       | 54           | 4       | 29                     | 4       | 15                    | 2       |
| PTGSE2                          | 43     | 3       | 25           | 1       | 40                     | 4       | 30                    | 2       |
| raldh1a1                        | 6      | 2       | 6            | 1       | 6                      | 2       | 4                     | 1       |
| raldh1a2                        | 26     | 2       | 20           | 1       | 24                     | 4       | 27                    | 5       |
| raldh1a3                        | 4      | 1       | 8            | 1       | 8                      | 0       | 7                     | 1       |
| Shfm1                           | 1216   | 4       | 1212         | 15      | 1297                   | 10      | 1311                  | 8       |
| TGF- $\beta$ 1                  | 1005   | 15      | 1057         | 37      | 1008                   | 82      | 794                   | 20      |
| Tim2                            | 11     | 0       | 18           | 4       | 18                     | 4       | 17                    | 2       |
| Tim3                            | 98     | 2       | 88           | 7       | 53                     | 9       | 56                    | 1       |
| TIM4                            | 29     | 6       | 30           | 1       | 60                     | 4       | 43                    | 1       |
| TNF- $\alpha$                   | 102    | 1       | 102          | 8       | 3875                   | 320     | 1398                  | 28      |
| Tomm7                           | 2123   | 8       | 2132         | 27      | 1992                   | 16      | 1970                  | 13      |
| TSLP                            | 13     | 2       | 10           | 1       | 19                     | 1       | 15                    | 0       |

Table S2: mRNA expression pattern of small intestinal tissue from a representative food allergy experiment. (<sup>a</sup> PBS/alum = not sensitized, <sup>b</sup> OVA/alum = sensitized)

|                                     | WT(-) <sup>a</sup> | WT(+) <sup>b</sup> | TG(-) <sup>a</sup> | TG(+) <sup>b</sup> |
|-------------------------------------|--------------------|--------------------|--------------------|--------------------|
| <b>raldh1a1</b>                     | 119940             | 51028              | 124449             | 55254              |
| <b>Claudin 7</b>                    | 46545              | 44772              | 46202              | 43133              |
| <b>CCL-24 (eotaxin2)</b>            | 16571              | 6124               | 11621              | 6801               |
| <b>CCL-5 (RANTES)</b>               | 7847               | 5980               | 11408              | 5573               |
| <b>Mcpt1 (mast cell protease 1)</b> | 7417               | 1155732            | 4768               | 736576             |
| <b>Claudin 2</b>                    | 7399               | 12152              | 8239               | 8383               |
| <b>Mcpt2 (mast cell protease 2)</b> | 5155               | 521442             | 2842               | 324659             |
| <b>TGFβ-1</b>                       | 4721               | 5375               | 3623               | 6082               |
| <b>IL-33</b>                        | 4716               | 6856               | 4930               | 5598               |
| <b>FcRγ-chain</b>                   | 3589               | 5030               | 4035               | 5468               |
| <b>CD11c</b>                        | 3474               | 3636               | 3212               | 5267               |
| <b>CD103</b>                        | 3466               | 7666               | 3574               | 6968               |
| <b>raldh1a2</b>                     | 2758               | 2595               | 2582               | 3323               |
| <b>CD8 alpha</b>                    | 2546               | 1597               | 2783               | 1433               |
| <b>CD3 epsilon</b>                  | 1971               | 1212               | 1916               | 1188               |
| <b>IL-15</b>                        | 1582               | 848                | 1423               | 968                |
| <b>CXCL11(I-TAC)</b>                | 1357               | 833                | 1373               | 889                |
| <b>IL-9</b>                         | 1094               | 463                | 1080               | 549                |
| <b>IL-1a</b>                        | 574                | 422                | 390                | 299                |
| <b>Cxcl10 (IP10)</b>                | 552                | 387                | 534                | 417                |
| <b>mouse FcεRI alpha</b>            | 518                | 36538              | 270                | 20007              |
| <b>CPA3 (Carboxypeptidase 3A)</b>   | 454                | 28069              | 292                | 15022              |
| <b>CCL-8 (MCP-2)</b>                | 409                | 10834              | 389                | 5598               |
| <b>CCL-3 (MIP-1a)</b>               | 312                | 264                | 353                | 288                |
| <b>CCL-17 (TARC)</b>                | 226                | 335                | 215                | 183                |
| <b>TSLP</b>                         | 171                | 266                | 208                | 256                |
| <b>CCR4</b>                         | 87                 | 167                | 45                 | 125                |
| <b>mouse FcεRI beta</b>             | 84                 | 6415               | 57                 | 4079               |
| <b>IL17-F</b>                       | 83                 | 60                 | 97                 | 63                 |
| <b>IL12-b</b>                       | 73                 | 66                 | 66                 | 74                 |
| <b>IL-4</b>                         | 67                 | 960                | 56                 | 694                |
| <b>IL17E (IL-25)</b>                | 59                 | 82                 | 81                 | 61                 |
| <b>IL-13</b>                        | 56                 | 205                | 55                 | 77                 |
| <b>IL-6</b>                         | 50                 | 553                | 37                 | 342                |
| <b>human FcεRI alpha</b>            | 47                 | 40                 | 10981              | 28620              |
| <b>IL-17a</b>                       | 45                 | 98                 | 27                 | 88                 |
| <b>CCL-7 (MCP-3)</b>                | 34                 | 157                | 33                 | 109                |
| <b>IL-10</b>                        | 23                 | 160                | 25                 | 90                 |
| <b>IFN-γ</b>                        | 13                 | 108                | 11                 | 106                |
| <b>IL-5</b>                         | 12                 | 108                | 6                  | 66                 |



## Figures for Reviewers

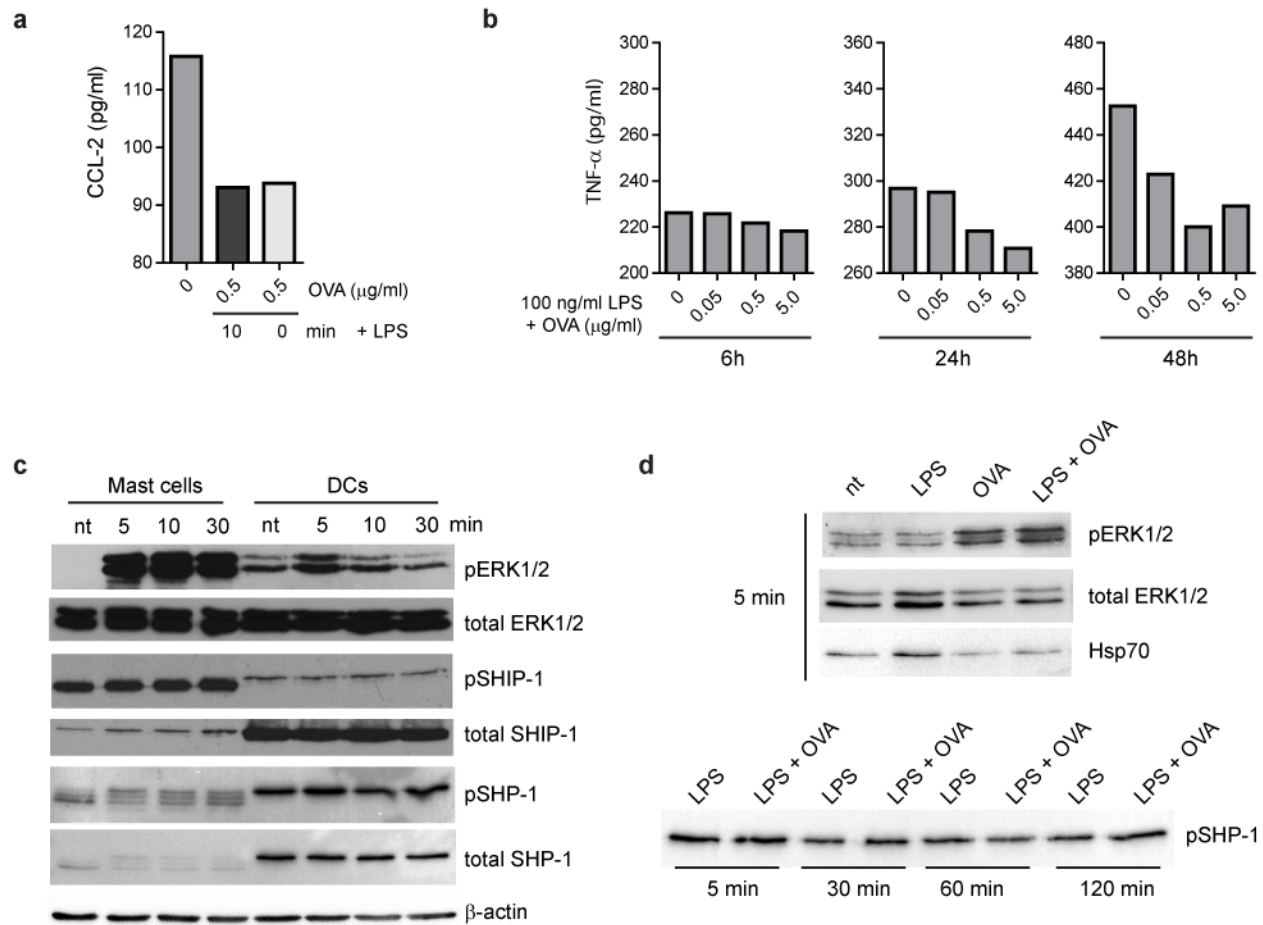

**Figure R1** Additional data regarding antigen-mediated IgE/FcεRI cross-linking. **(a)** LPS-induced CCL-2 production is inhibited independently of simultaneous or consecutive FcεRI cross-linking. IgE-loaded DCs were stimulated with LPS (all conditions). Indicated concentrations of OVA were added for IgE/FcεRI crosslinking, either simultaneously with LPS (0 min) or after 10 min. Culture supernatant was harvested after 48h and CCL-2 production was analyzed by ELISA. Data are representative of pooled triplicates. **(b)** Time course and antigen dose response experiments. DCs were stimulated with indicated concentrations of OVA and cell culture supernatants were analyzed after 6h, 24h and 48h. Inhibition of CCL2 production becomes more obvious over the time course. **(c)** Comparison of signaling events induced upon antigen-mediated FcεRI cross-linking in mast cells and DCs. Bone-marrow derived mast cells and DCs were pre-loaded with NP-specific IgE. Receptor crosslinking was induced with 0.5μg/ml NP-OVA, cell extracts were prepared after indicated time points, and signaling molecules were analyzed by immunoblot. **(d)** FcεRI cross-linking does not lead to increased SHP-1 phosphorylation upon LPS co-stimulation. IgE-loaded DCs were co-stimulated with LPS and NP-OVA as indicated and signaling molecules were analyzed by immunoblot.

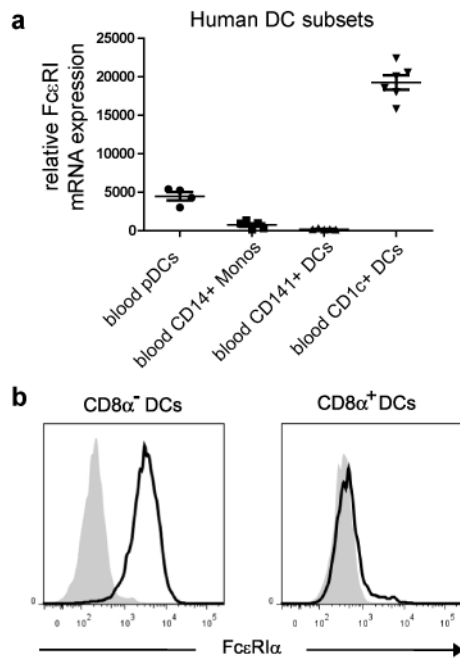

**Figure R2** Comparison of FcεRI expression in human DCs subsets and DCs from IgE<sub>R</sub>-TG animals. **(a)** We used publicly available microarray data (Haniffa et al., 2012, *Immunity* 37:60-73: Human tissues contain CD141<sup>hi</sup> cross-presenting dendritic cells with functional homology to mouse CD103<sup>+</sup> nonlymphoid dendritic cells.) to define expression levels of FcεRI in different human DC populations from healthy individuals. Human CD1c<sup>+</sup> DCs are defined as functional homologues of murine CD8α<sup>-</sup> DCs and showed the highest transcript levels of FcεRI. FcεRI is further expressed in pDCs and, albeit at a rather low level, in CD14<sup>+</sup> monocytes. No transcripts were detected in human CD141<sup>+</sup> (BDCA3) DCs which are the homologues of murine CD8α<sup>+</sup> DCs. **(b)** The human DC subset expression pattern of FcεRI at steady state is accurately phenocopied in splenic DCs from IgE<sub>R</sub>-TG mice with high levels of surface receptor expression on CD8α<sup>-</sup> DCs.
